# Supplementary material for: Insulin signalling in tanycytes gates hypothalamic insulin uptake and regulation of AgRP neuron activity
Source: PubMed Central journal article supplement (PMC8688146; doi:10.1038/s42255-021-00499-0), 2021-12-20
Supplement: 42255_2021_499_MOESM14_ESM.pdf [file 42255_2021_499_MOESM14_ESM.pdf]

1 **Source data**

2 Uncropped images of the gels presented in Suppl. Fig. 3

3

4 **Hypothalamus**

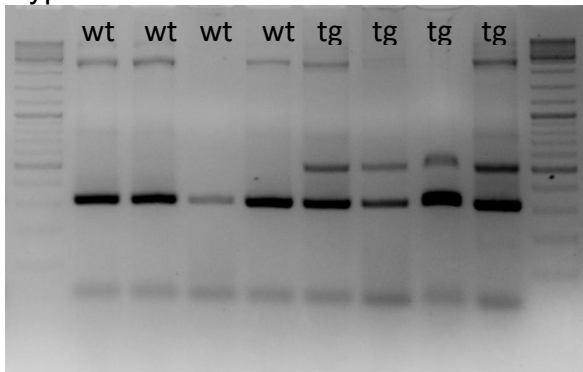

5

6

7 **Cortex**

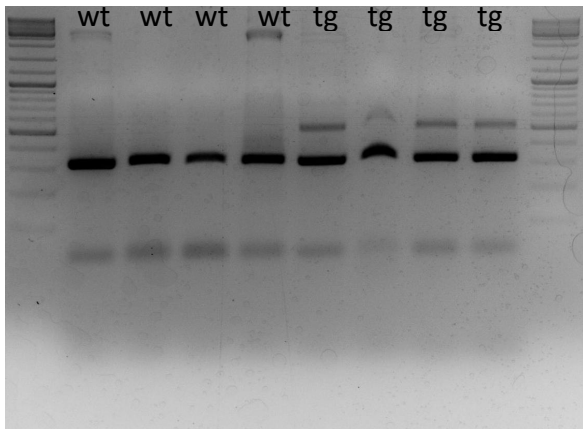

8

9

10 **Muscle**

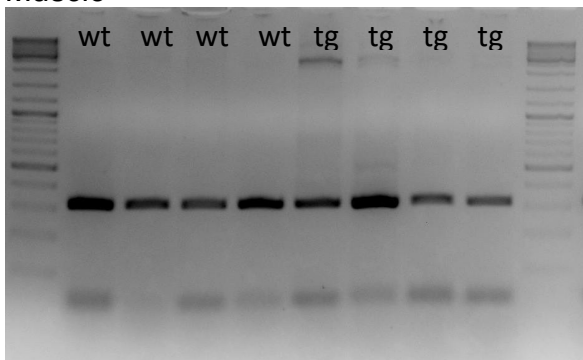

11

12

13 **Liver**

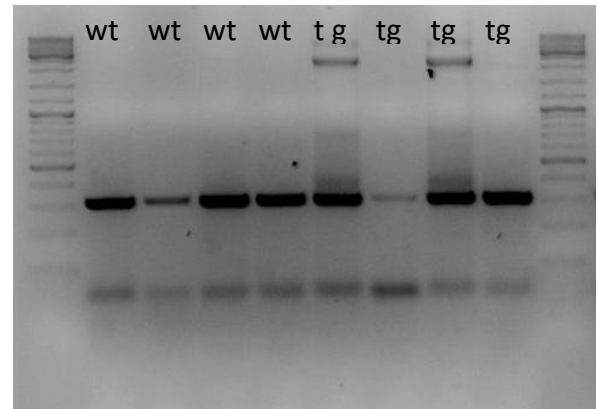

14

15

16 **BAT**

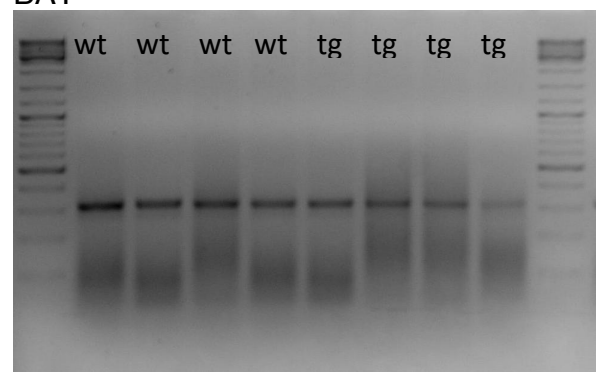

17

18

19 **WAT**

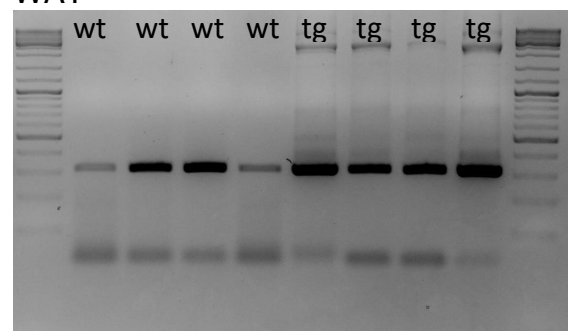

20
